# Supplementary material for: A facile and one-step ethanol-thermal synthesis of MoS2 quantum dots for two-photon fluorescence imaging
Source: Royal Society of Chemistry journal article supplement (doi:10.1039/c5tb01839k), 2015-11-23
Supplement: c5tb01839k1.pdf [file c5tb01839k1.pdf]

SUPPORTING INFORMATION

**A facile and one-step ethanol-thermal synthesis of MoS<sub>2</sub> quantum dots for two-photon fluorescence imaging**

Wei Gu,<sup>a</sup> Yinghan Yan,<sup>a</sup> Xuni Cao,<sup>b</sup> Cuiling Zhang,<sup>\*a</sup> Caiping Ding<sup>a</sup> and  
Yuezhong Xian<sup>\*a</sup>

a Department of Chemistry, School of Chemistry and Molecular Engineering, East China Normal University, Shanghai 200241, China

b School of Biotechnology, East China University of Science and Technology, Shanghai 200237, China

Corresponding Authors: [clzhang@chem.ecnu.edu.cn](mailto:clzhang@chem.ecnu.edu.cn);  
[yzxian@chem.ecnu.edu.cn](mailto:yzxian@chem.ecnu.edu.cn)

## EXPERIMENTAL SECTION

### Reagents and Chemicals

Bulk molybdenum (IV) disulfide ( $\text{MoS}_2$  powder, 99.5%), quinine sulfate dehydrate (99.0%), propidium iodide (PI, 94.0%) and bisBenzimide H 33342 trihydrochloride (Hoechst 33342, 98%) were commercially available from Aladdin Industrial Co. Ltd. (Shanghai, China). 3-(4,5-Dimethylthiazol-2-yl)-2,5-diphenyltetrazolium bromide (MTT) was obtained from Amresco (USA). Ethanol, sodium phosphate monobasic dihydrate ( $\text{NaH}_2\text{PO}_4 \cdot 2\text{H}_2\text{O}$ ), sodium phosphate dibasic dodecahydrate ( $\text{Na}_2\text{HPO}_4 \cdot 12\text{H}_2\text{O}$ ), sodium chloride (NaCl), dimethyl sulfoxide (DMSO) and sulfuric acid were purchased from Sinopharm Chemical Reagent Co., Ltd. (Shanghai, China). Deionized distilled water was used throughout.

### Instruments and Measurements

Transmission electron microscope (TEM) and high resolution transmission electron microscope (HR-TEM) imaging were performed using JEM-2100F transmission electron microscope (JEOL, Japan). Atomic force microscope (AFM) image was recorded with a tapping mode in air using Multimode 8 atomic force microscope (VEECO, USA). X-ray diffraction (XRD) pattern was characterized on D8 advance X-ray powder diffractometer (Bruker, Germany). Raman measurement was obtained by confocal Raman 35 microscope (CRM200, WITec) with 50 $\times$  objective using excitation laser line of 532 nm. The X-ray photoelectron spectra (XPS) was detected on AXIS Ultra DLD X-ray photoelectron spectrometer (Shimadzu, Japan). UV-vis spectra was

taken using UV-2550 spectrophotometer (Shimadzu, Japan). Fluorescent spectra and fluorescence lifetime were recorded on F-7000 fluorescence spectrometer (Hitachi, Japan) and C11367 fluorescence lifetime spectrometer (Hamamatsu Photonics, Japan), respectively. The cell images were taken by TCS SP8 MP multiphoton microscope (Leica, Germany) with femtosecond laser pulse and Ti: sapphire system as the light source.

### **Synthesis of MoS<sub>2</sub> QDs**

The MoS<sub>2</sub> QDs were synthesized through one-step solvothermal route from MoS<sub>2</sub> powder. In a typical procedure, 20 mg MoS<sub>2</sub> powder was dispersed to 40 mL ethanol and was ultrasonicated for 6 h. Then, the mixture was transferred into a 50 mL poly(tetrafluoroethylene) (Teflon) autoclave which was kept at 200 °C for 12 h, followed by cooling to room temperature. The reaction solution was filtered by the 0.22 µm microporous membrane to remove large tracts of MoS<sub>2</sub>. The solid product can be obtained by vacuum distillation.

### **Cytotoxicity Assay**

The cytotoxicity of MoS<sub>2</sub> QDs was assessed on human breast-cancer cells MDA-MB-468 by the MTT assay. The cells were cultured and maintained in Dulbecco's Modified Eagle's medium (DMEM) with fetal bovine serum (10%, v/v). Firstly, the cells were seeded in a 96-well plate at a density of  $5 \times 10^3$  cells per well and cultured in an incubator at 37 °C with 5% CO<sub>2</sub> for 18 h. Then, the cells were incubated in the fresh culture medium containing MoS<sub>2</sub> QDs with different concentrations of (25, 50,

75, 100, 120, 150  $\mu\text{g/mL}$ ) for 24 h and washed with PBS for three times. 100  $\mu\text{L}$  of the new culture medium containing MTT (20  $\mu\text{L}$ , 5  $\text{mg/mL}$ ) was added to each well, and followed by incubation for 4 h. Finally, the medium was replaced with 100  $\mu\text{L}$  DMSO and the absorbance at 490 nm was measured on a Synergy H1 Multi-Mode Reader (BioTek, USA), the cell viability was determined by manually subtracting the blank value and normalized against the control values.

#### **Hoechst 33342/PI staining**

MDA-Mb-468 cells were planted onto 12 mm-diameter glass coverslips in a 24-well plate, and incubated for 48 h in DMEM. Then, different concentrations of  $\text{MoS}_2$  QDs (0, 50, 100, 150  $\mu\text{g/mL}$ ) were added into the culture medium, followed by incubation for 24 h, respectively. After removing the DMEM medium, MDA-MB-468 cells were stained with Hoechst 33342 (5  $\mu\text{g/mL}$ ) for 20 min and then PI (10  $\mu\text{g/mL}$ ) for 15 min. Finally, the cells were washed with PBS three times and mounted by anti-fade mounting media. Fluorescence images of cells were acquired by confocal microscopy.

#### **Two-photon Cell Imaging**

MDA-MB-468 and Hela cells were placed onto 12 mm-diameter glass coverslips in a 24-well plates, and incubated for 48 h in DMEM to adhere on cover glass, respectively.  $\text{MoS}_2$  QDs were added at the concentration of 20  $\mu\text{g/mL}$  into the culture medium, and the cells were grown for another 3 h. Then, the cells on the cover slip were wash with PBS to remove free  $\text{MoS}_2$  QDs and mounted by anti-fade mounting media. Cells were imaged on a TCS SP8 MP multiphoton microscope, and the excitation wavelength was 690 nm.

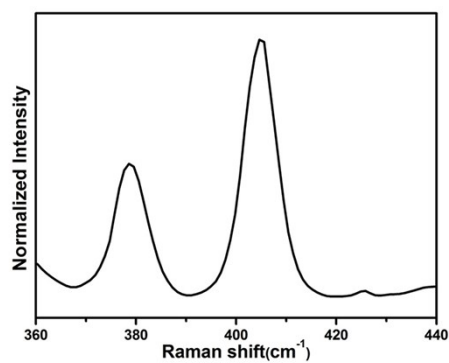

Fig. S1 Raman spectrum of the MoS<sub>2</sub> QDs (Ex: 532 nm).

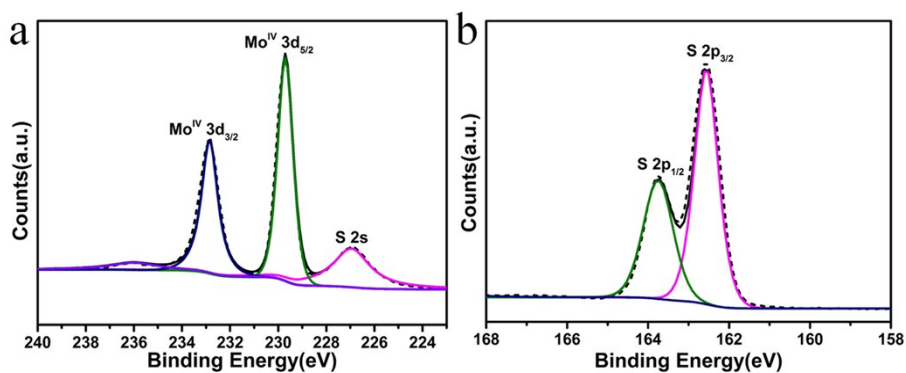

Fig. S2 XPS spectra of (a) Mo 3d and (b) S 2p regions for MoS<sub>2</sub> QDs.

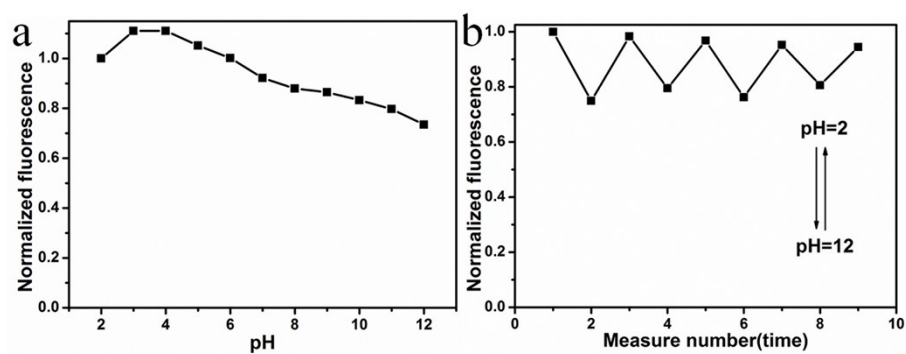

Fig. S3 (a) Effect of pH on fluorescent intensity of MoS<sub>2</sub> QDs, (b) reversible switching of fluorescent intensity with the change of pH between 2 and 12.

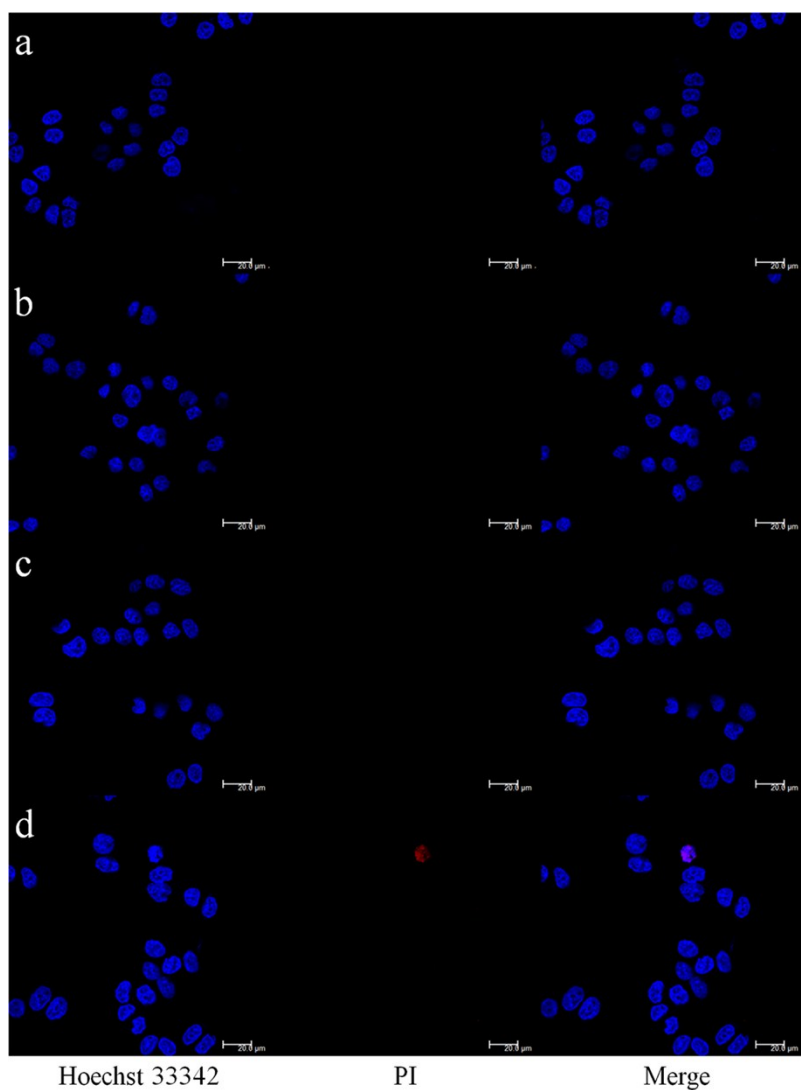

Fig. S4 Fluorescence images of MDA-MB-468 cells incubated with different concentrations of MoS<sub>2</sub> QDs for 24 h (a: 0 µg/mL, b: 50 µg/mL, c: 100 µg/mL, d: 150 µg/mL) followed by staining with Hoechst 33342 and PI.

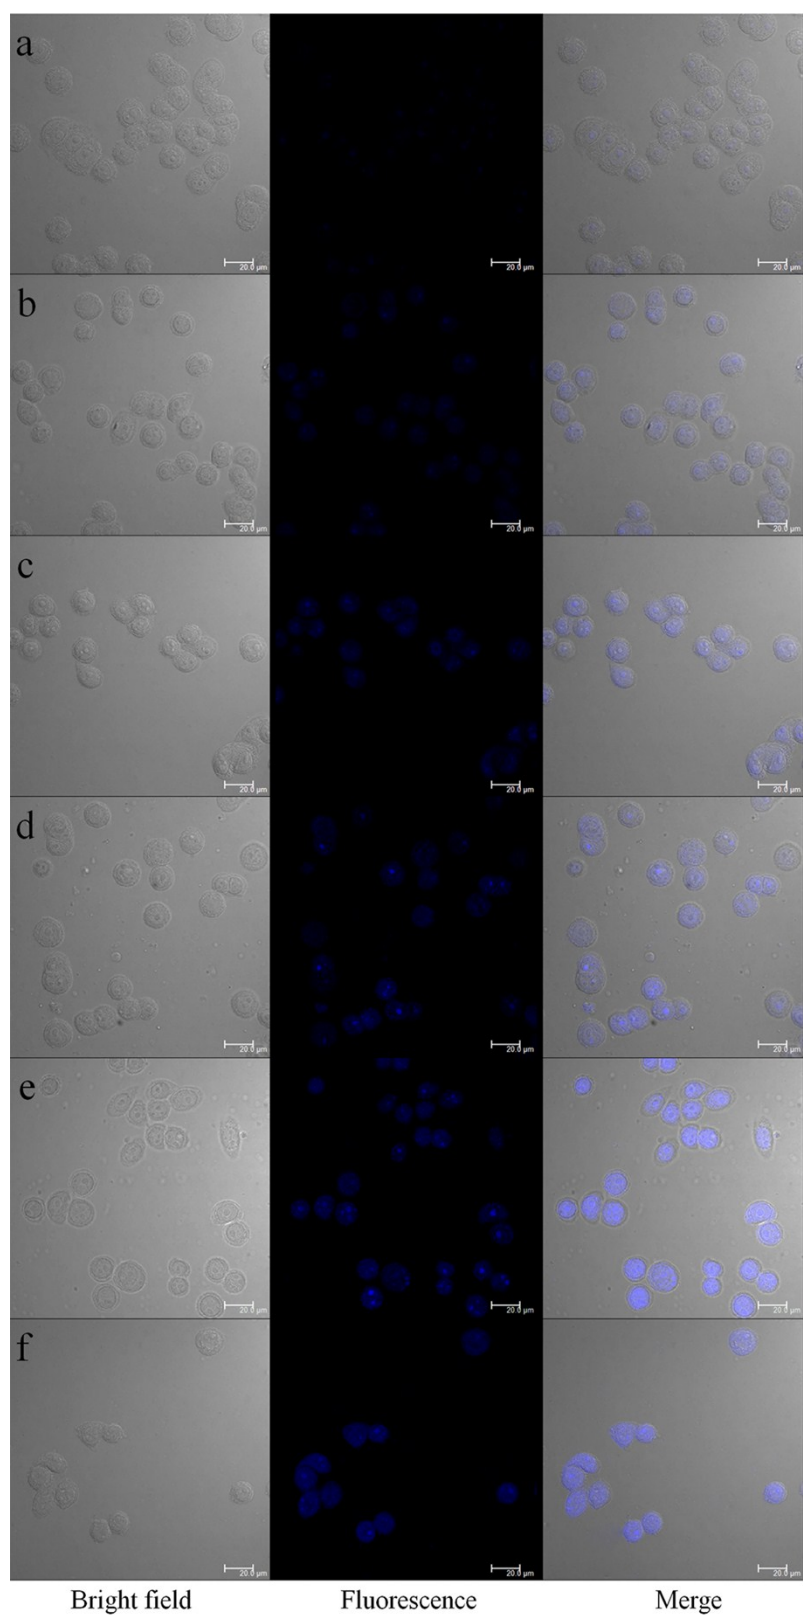

Fig. S5 TPF images of MDA-MB-468 cells incubated with MoS<sub>2</sub> QDs (50 μg/mL) from 0 min to 3 h. (a: 0 min, b: 10 min, c: 30 min, d: 1 h, e: 2 h, f: 3 h)

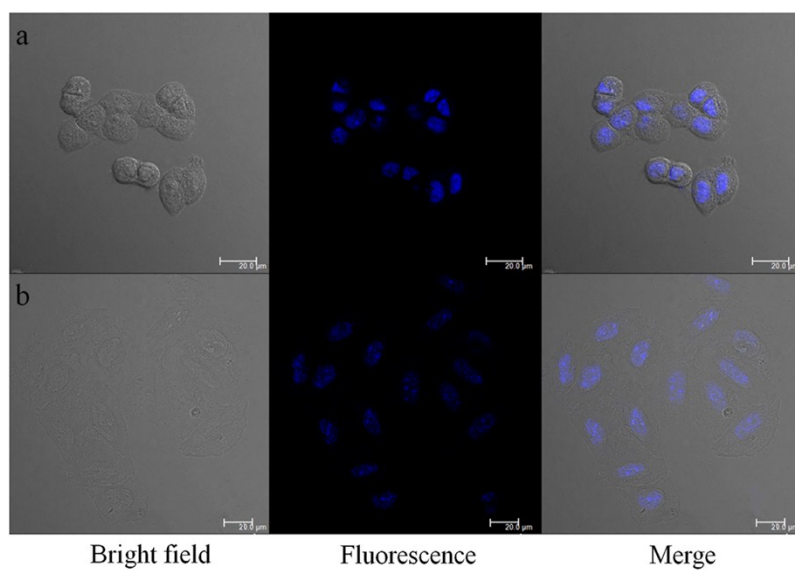

Fig. S6 TPF images of MDA-MB-468 cells (a) and Hela cells (b) incubated with MoS<sub>2</sub> QDs. Experiment conditions: the cells have been incubated with the MoS<sub>2</sub> QDs at 37 °C for 2 h.

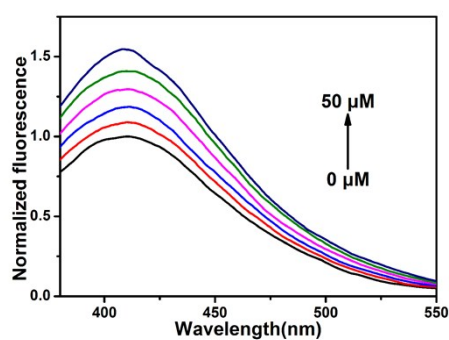

Fig. S7 Fluorescence of the aqueous solution of the MoS<sub>2</sub> QDs in the presence of different concentrations of DNA.



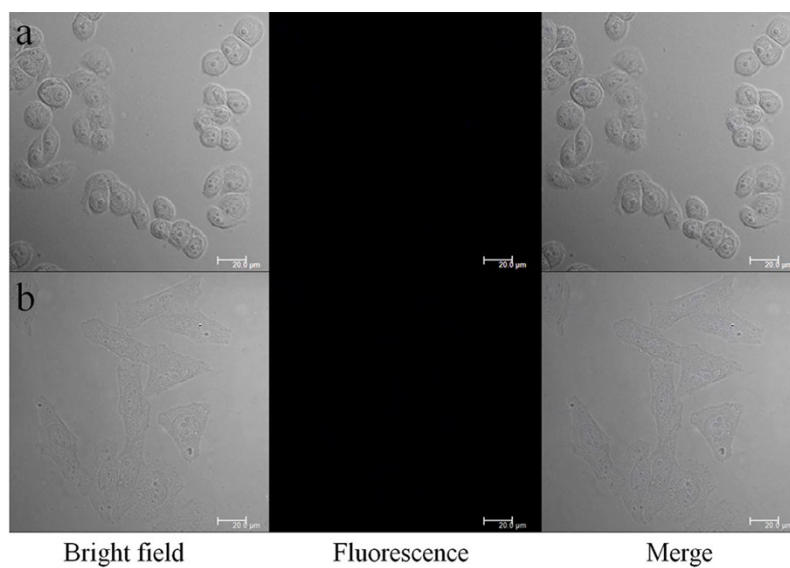

Fig. S8 TPF images in MDA-MB-468 cells (a) and Hela cells (b) without MoS<sub>2</sub> QDs

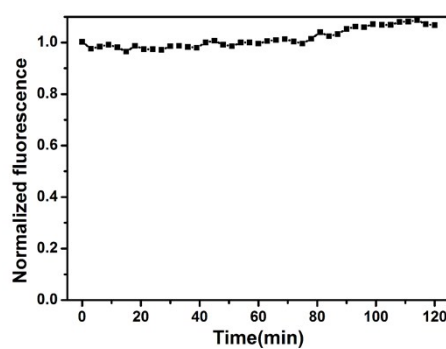

Fig. S9 Photostability of MoS<sub>2</sub> QDs under excitation of 690 nm within cells.
